# Supplementary material for: Protein family neighborhood analyzer—ProFaNA
Source: PeerJ journal article supplement (doi:10.7717/peerj.15715), 2023-07-21
Supplement: Suppl_Figure1.pdf [file Suppl_Figure1.pdf]

# Domain occurrence

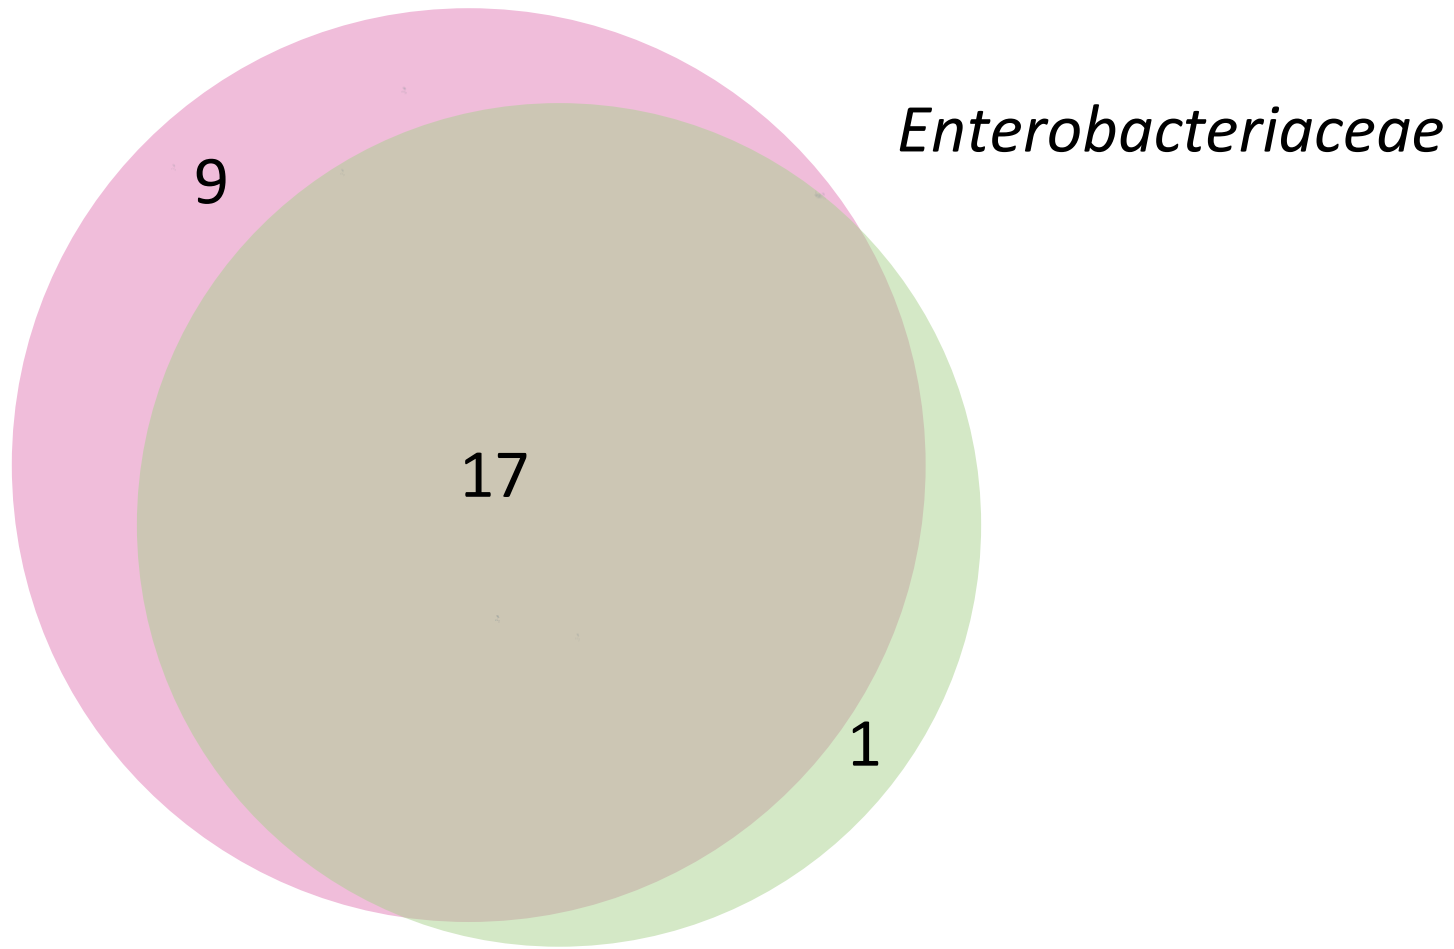

*Escherichia sp., Salmonella sp., Klebsiella sp.*
