# Supplementary material for: Protein family neighborhood analyzer—ProFaNA
Source: PeerJ journal article supplement (doi:10.7717/peerj.15715), 2023-07-21

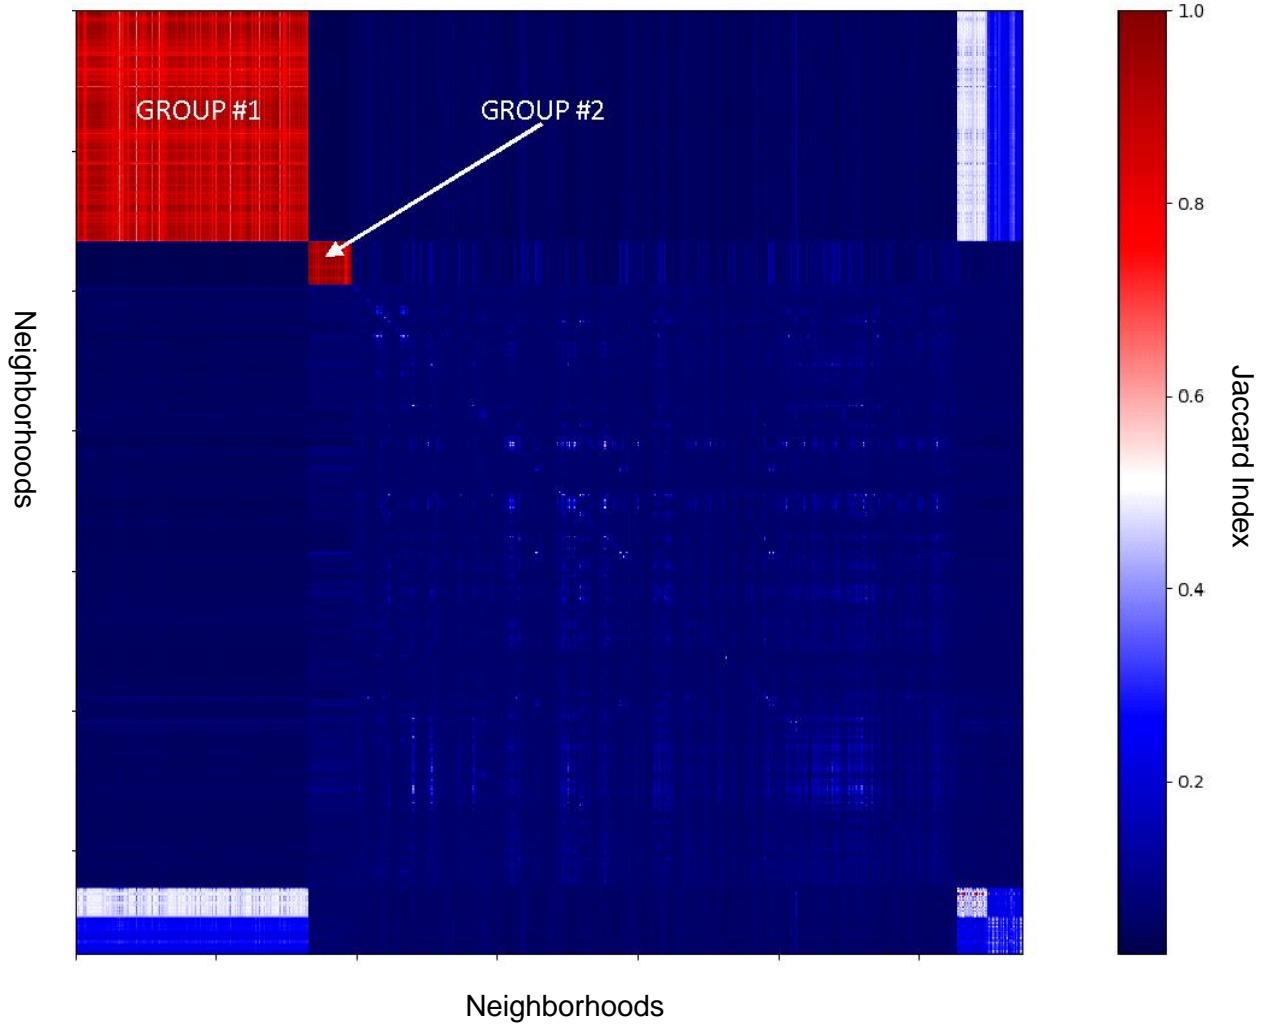

Supplement: Suppl_Figure_2.pdf [file Suppl_Figure_2.pdf]
